# Supplementary material for: Synthesis of a dimeric phosphine-stabilized phosphidogermanium(i)–amidogermanium(ii) derivative
Source: Royal Society of Chemistry journal article supplement (doi:10.1039/c8cc09454c), 2019-01-01
Supplement: c8cc09454c1.pdf [file c8cc09454c1.pdf]

## **Synthesis of a Dimeric Phosphine-Stabilized Phosphidogermanium(I)- Amidogermanium(II) Derivative**

Muhammad Luthfi Bin Ismail <sup>a</sup> and Cheuk-Wai So\*<sup>a</sup>

Division of Chemistry and Biological Chemistry, School of Physical and Mathematical Sciences,  
Nanyang Technological University, Singapore 637371

### **Supporting Information**

1. Experimental Procedure
2. Selected NMR Spectra
3. References

## 1. Experimental Section

**General Procedures.** All chemical manipulations were performed using standard Schlenk techniques, under an atmosphere of argon gas. The solvents used were purified by the MBRAUN solvent purification system. Compound **1** was prepared by methods outlined in the literature.<sup>1</sup> The <sup>1</sup>H, <sup>13</sup>C, <sup>29</sup>Si and <sup>31</sup>P NMR spectra were recorded in deuterated benzene (C<sub>6</sub>D<sub>6</sub>) on a JEOL ECA 400 spectrometer. The chemical shifts (δ) are relative to SiMe<sub>4</sub> for <sup>1</sup>H, <sup>13</sup>C and <sup>29</sup>Si and 85% H<sub>3</sub>PO<sub>4</sub> for <sup>31</sup>P. Elemental analyses were performed by Nanyang Technological University, Division of Chemistry and Biological Chemistry. Melting points were measured in sealed glass tubes and were uncorrected.

**Synthesis of [L{(Ar)(Ph<sub>2</sub>P)N}Si:→GeCl<sub>2</sub>] (**2**).** Toluene (20 mL) was added to a mixture of [L{(Ar)(Ph<sub>2</sub>P)N}Si:] (**1**) (0.62 g, 1.00 mmol) and GeCl<sub>2</sub>.dioxane (0.23 g, 1.00 mmol) and stirred for 16 hours at ambient temperature. The resulting orange mixture was filtered and concentrated to ca. 10 mL to afford compound **2** as colourless crystals. Yield: 0.27 g (31.6 %). Mp. 213.7 °C (decomposed). Elemental analysis calcd for C<sub>46</sub>H<sub>58</sub>Cl<sub>2</sub>GeN<sub>3</sub>PSi (**2**.C<sub>7</sub>H<sub>8</sub>): C, 64.56; H, 6.84; N, 4.91. Found: C, 64.54; H, 6.55; N, 5.11. <sup>1</sup>H NMR (399.5 MHz, C<sub>6</sub>D<sub>6</sub>, 23.3 °C): δ 0.23 (d, <sup>2</sup>J<sub>HH</sub> = 6.4 Hz, 6H, CH(CH<sub>3</sub>)<sub>2</sub>), 1.24 (s, 18H, *t*Bu), 1.29 (d, <sup>2</sup>J<sub>HH</sub> = 6.4 Hz, 6H, CH(CH<sub>3</sub>)<sub>2</sub>), 3.52 (br, 2H, CH(CH<sub>3</sub>)<sub>2</sub>), 6.83 – 7.01 (m, 8H, Ph), 7.03 – 7.12 (m, 4H, Ph), 7.29 (d, 1H, <sup>3</sup>J<sub>HH</sub> = 7.7 Hz, Ph), 7.50 (m, 4H, Ph), 8.54 (d, 1H, <sup>3</sup>J<sub>HH</sub> = 7.7 Hz, Ph). <sup>13</sup>C{<sup>1</sup>H} NMR (99.5 MHz, C<sub>6</sub>D<sub>6</sub>, 24.9 °C): δ 23.92, 24.05 (CH(CH<sub>3</sub>)<sub>2</sub>), 28.41 (CH(CH<sub>3</sub>)<sub>2</sub>), 31.95, 55.62 (*t*Bu), 125.11, 126.60, 127.24, 128.38, 128.45, 129.91, 130.30, 130.59, 133.70, 135.34 (d, <sup>2</sup>J<sub>C-P</sub> = 21.9 Hz), 104.59, 147.33 (Ar). <sup>31</sup>P{<sup>1</sup>H} NMR (160.2 MHz, C<sub>6</sub>D<sub>6</sub>, 24.9 °C): δ 44.90. <sup>29</sup>Si{<sup>1</sup>H} NMR (79.4 MHz, C<sub>6</sub>D<sub>6</sub>, 24.9 °C): δ -12.85 (d, <sup>2</sup>J<sub>SiP</sub> = 43.1 Hz). The Si NMR signal is relatively weak due to quadrupolar broadening with the germanium nucleus (*I* = 9/2).

**Synthesis of [:Ge(Cl){N(Ar)PPh<sub>2</sub>}(Ph<sub>2</sub>P)Ge:]<sub>2</sub> (**3**).** The mother liquor from the synthesis of **2** was concentrated to ca. 5mL to afford **3** as orange crystals. Yield: 0.07 g (4.9 %). Mp. 183.5 °C (decomposed). Elemental analysis calcd for C<sub>72</sub>H<sub>74</sub>Cl<sub>2</sub>Ge<sub>4</sub>N<sub>2</sub>P<sub>4</sub>: C, 59.51; H, 5.14; N, 1.93. Found: C, 59.37; H, 5.02; N, 1.87. <sup>31</sup>P{<sup>1</sup>H} CP-MAS NMR: δ -14.03, 103.63.

**Synthesis of [L(PPh<sub>2</sub>)Si=NAr] (**6**).** C<sub>6</sub>D<sub>6</sub> (0.4 mL) was added to **1** (31 mg) in an NMR tube. The resulting solution was heated to 80 °C for 16 hours and monitored periodically by <sup>31</sup>P{<sup>1</sup>H} NMR. All volatiles were removed and hexane (1.0 mL) was added. The resulting mixture was filtered and concentrated to afford **6** as yellow crystals. Yield: 29 mg (93.5 %). Mp. 212.9 °C (decomposed). Elemental analysis calcd for C<sub>39</sub>H<sub>50</sub>N<sub>3</sub>PSi: C, 75.56; H, 8.13; N, 6.78. Found: C, 75.24; H, 8.01; N, 6.64. <sup>1</sup>H NMR (399.5 MHz, C<sub>6</sub>D<sub>6</sub>, 23.3 °C): δ 1.01 (s, 18H, *t*Bu), 1.45 (d, <sup>3</sup>J<sub>HH</sub> = 7.30 Hz, 12H, CH(CH<sub>3</sub>)<sub>2</sub>), 4.23 (sept, <sup>3</sup>J<sub>HH</sub> = 7.30 Hz, 2H, CH(CH<sub>3</sub>)<sub>2</sub>), 6.84 – 6.90 (m, 4H, Ph), 7.01 – 7.11 (m, 8H, Ph), 7.37 (d, <sup>3</sup>J<sub>HH</sub> = 7.75 Hz, 2H, Ph), 7.96 – 8.00 (m, 4H, Ph). <sup>13</sup>C{<sup>1</sup>H} NMR (99.5 MHz, C<sub>6</sub>D<sub>6</sub>, 24.9 °C): δ 28.40, 23.30 (CH(CH<sub>3</sub>)<sub>2</sub>), 31.25, 41.52 (*t*Bu), 123.33, 128.11,

128.71, 131.08, 131.29, 148.22, 150.67 (Ph).  $^{31}\text{P}\{^1\text{H}\}$  NMR (160.2 MHz,  $\text{C}_6\text{D}_6$ , 24.9 °C):  $\delta$  -53.56.  $^{29}\text{Si}\{^1\text{H}\}$  NMR (79.4 MHz,  $\text{C}_6\text{D}_6$ , 24.9 °C):  $\delta$  -77.70 (d,  $J_{\text{SiP}} = 10.6$  Hz).

**Synthesis of [ $\{\text{Ph}_2\text{PN}(\text{Ar})\text{GeCl}\}\{\text{Ph}_2\text{PGeCl}\}$ ] (7).** Toluene (20 mL) was added to a mixture of **3** (0.58 g, 0.40 mmol) and  $\text{B}(\text{C}_6\text{F}_5)_3$  (0.41 g, 0.80 mmol) at room temperature and stirred for 16 hours. The insoluble precipitate was filtered, and the filtrate was concentrated to obtain **7** as colourless crystalline solid. Yield: 0.03g (9.8 %) Mp. 194.5 °C. Elemental analysis calcd for  $\text{C}_{36}\text{H}_{37}\text{Cl}_2\text{Ge}_2\text{NP}_2$ : C, 56.76; H, 4.90; N, 1.84. Found: C, 56.47; H, 4.78; N, 1.76.  $^1\text{H}$  NMR (399.5 MHz,  $\text{C}_6\text{D}_6$ , 23.3 °C) shows two geometric isomers (*cis* and *trans*). *1<sup>st</sup> set*:  $\delta$  -0.057 (d,  $^3J_{\text{HH}} = 6.8$  Hz, 3H,  $\text{CH}(\text{CH}_3)_2$ ), 0.46 (d,  $^3J_{\text{HH}} = 6.4$  Hz, 3H,  $\text{CH}(\text{CH}_3)_2$ ), 0.66 (d, 3H,  $\text{CH}(\text{CH}_3)_2$ , overlapping with the 2<sup>nd</sup> set), 2.30 (sept,  $^3J_{\text{HH}} = 6.8$  Hz, 1H,  $\text{CH}(\text{CH}_3)_2$ ), 4.40 (sept,  $^3J_{\text{HH}} = 6.8$  Hz, 1H,  $\text{CH}(\text{CH}_3)_2$ ), 6.79 – 7.13 (m, Ph, overlapping with the 2<sup>nd</sup> set), 7.44 – 8.03 (m, Ph, overlapping with the 2<sup>nd</sup> set). *2<sup>nd</sup> set*:  $\delta$  0.51 (d,  $^3J_{\text{HH}} = 6.8$  Hz, 3H,  $\text{CH}(\text{CH}_3)_2$ ), 0.63 (d,  $^3J_{\text{HH}} = 6.8$  Hz, 3H,  $\text{CH}(\text{CH}_3)_2$ ), 1.43 (d,  $^3J_{\text{HH}} = 6.8$  Hz, 3H,  $\text{CH}(\text{CH}_3)_2$ ), 1.47 (d,  $^3J_{\text{HH}} = 6.8$  Hz, 3H,  $\text{CH}(\text{CH}_3)_2$ ), 4.10 (sept,  $^3J_{\text{HH}} = 6.8$  Hz, 1H,  $\text{CH}(\text{CH}_3)_2$ ), 4.18 (sept,  $^3J_{\text{HH}} = 6.8$  Hz, 1H,  $\text{CH}(\text{CH}_3)_2$ ), 6.79 – 7.13 (m, Ph, overlapping with the 1<sup>st</sup> set), 7.44 – 8.03 (m, Ph, overlapping with the 1<sup>st</sup> set).  $^{31}\text{P}\{^1\text{H}\}$  NMR (160.2 MHz,  $\text{C}_6\text{D}_6$ , 24.9 °C) shows two geometric isomers (*cis* and *trans*). *1<sup>st</sup> set*:  $\delta$  88.6 ppm,  $^3J_{\text{PP}} = 34.7$  Hz ( $\text{Ph}_2\text{PGeCl}$ ), -19.3 ppm,  $^3J_{\text{PP}} = 34.7$  Hz ( $\text{Ph}_2\text{PN}(\text{Ar})\text{GeCl}$ ); *2<sup>nd</sup> set*:  $\delta$  96.7 ppm,  $^3J_{\text{PP}} = 30.3$  Hz ( $\text{Ph}_2\text{PGeCl}$ ), -27.1 ppm,  $^3J_{\text{PP}} = 30.3$  Hz ( $\text{Ph}_2\text{PN}(\text{Ar})\text{GeCl}$ ).

**X-ray Data Collection and Structural Refinement.** Intensity data for compounds **2**, **3**, **6** and **7** were collected using a Bruker APEX II diffractometer. The crystals of **2**, **3**, **6** and **7** were measured at 103(2) K. The structures were solved by direct phase determination (SHELXS-97) and refined for all data by full-matrix least-squares methods on  $F^2$ .<sup>2</sup> All non-hydrogen atoms were subjected to anisotropic refinement. The hydrogen atoms were generated geometrically and allowed to ride on their respective parent atoms; they were assigned appropriate isotropic thermal parameters and included in the structure-factor calculations.

**Table S1: Crystallographic data for compounds 2, 3, 6 and 7**

|                                                     | <b>2</b>                                                             | <b>3</b>                                                          | <b>6</b>                                           | <b>7</b>                                                                        |
|-----------------------------------------------------|----------------------------------------------------------------------|-------------------------------------------------------------------|----------------------------------------------------|---------------------------------------------------------------------------------|
| CCDC Number                                         | 1879740                                                              | 1879742                                                           | 1879741                                            | 1879744                                                                         |
| Formula                                             | C <sub>46</sub> H <sub>58</sub> Cl <sub>2</sub> GeN <sub>3</sub> PSi | C <sub>43</sub> H <sub>45</sub> ClGe <sub>2</sub> NP <sub>2</sub> | C <sub>39</sub> H <sub>50</sub> N <sub>3</sub> PSi | C <sub>36</sub> H <sub>37</sub> Cl <sub>2</sub> Ge <sub>2</sub> NP <sub>2</sub> |
| <i>M<sub>r</sub></i>                                | 855.50                                                               | 818.37                                                            | 619.88                                             | 761.68                                                                          |
| Color                                               | Colourless                                                           | orange                                                            | orange                                             | colorless                                                                       |
| Crystal System                                      | Triclinic                                                            | monoclinic                                                        | monoclinic                                         | triclinic                                                                       |
| Space Group                                         | <i>P</i> -1                                                          | <i>P</i> 1 21/ <i>n</i> 1                                         | <i>P</i> 1 21/ <i>n</i> 1                          | <i>P</i> -1                                                                     |
| <i>a</i> /Å                                         | 11.09490(10)                                                         | 11.7897(2)                                                        | 17.5974(4)                                         | 10.8060(5)                                                                      |
| <i>b</i> /Å                                         | 12.63690(10)                                                         | 16.3455(2)                                                        | 13.0761(4)                                         | 16.9006(7)                                                                      |
| <i>c</i> /Å                                         | 17.6502(2)                                                           | 20.0346(3)                                                        | 31.5626(8)                                         | 20.7677(9)                                                                      |
| <i>α</i> /deg                                       | 78.2671(5)                                                           | 90                                                                | 90                                                 | 66.7498(13)                                                                     |
| <i>β</i> /deg                                       | 89.0480(5)                                                           | 103.3601(8)                                                       | 103.6919(8)                                        | 89.8652(15)                                                                     |
| <i>γ</i> /deg                                       | 65.4174(5)                                                           | 90                                                                | 90                                                 | 81.2991(16)                                                                     |
| <i>V</i> / Å <sup>3</sup>                           | 2196.90(4)                                                           | 3756.35(10)                                                       | 7056.3(3)                                          | 3437.8(3)                                                                       |
| <i>Z</i>                                            | 2                                                                    | 4                                                                 | 8                                                  | 4                                                                               |
| <i>d</i> <sub>calcd</sub> /g cm <sup>-3</sup>       | 1.293                                                                | 1.447                                                             | 1.167                                              | 1.472                                                                           |
| <i>μ</i> / mm <sup>-1</sup>                         | 2.933                                                                | 3.668                                                             | 0.143                                              | 2.024                                                                           |
| <i>F</i> (000)                                      | 900                                                                  | 1684                                                              | 2672                                               | 1552                                                                            |
| Crystal Size/mm <sup>3</sup>                        | 0.120 x 0.220 x 0.300                                                | 0.010 x 0.020 x 0.040                                             | 0.160 x 0.200 x 0.220                              | 0.140 x 0.220 x 0.260                                                           |
| Index Range                                         | -13<= <i>h</i> <=13                                                  | -13<= <i>h</i> <=13                                               | -25<= <i>h</i> <=24                                | -15<= <i>h</i> <=15                                                             |
|                                                     | -14<= <i>k</i> <=14                                                  | -19<= <i>k</i> <=19                                               | -18<= <i>k</i> <=18                                | -24<= <i>k</i> <=22                                                             |
|                                                     | -21<= <i>l</i> <=20                                                  | -23<= <i>l</i> <=23                                               | -45<= <i>l</i> <=45                                | -30<= <i>l</i> <=0                                                              |
| No. of reflections                                  | 20072                                                                | 70144                                                             | 203092                                             | 22757                                                                           |
| <i>R</i> 1, <i>wR</i> 2 [ <i>I</i> >2σ( <i>I</i> )] | 0.0380, 0.0987                                                       | 0.0527, 0.1389                                                    | 0.0495, 0.1071                                     | 0.0707, 0.1694                                                                  |
| <i>R</i> 1, <i>wR</i> 2 (all data)                  | 0.0411, 0.1019                                                       | 0.0655, 0.1505                                                    | 0.0763, 0.1237                                     | 0.1224, 0.2075                                                                  |
| GOF, <i>F</i> <sup>2</sup>                          | 1.025                                                                | 1.038                                                             | 1.055                                              | 1.014                                                                           |
| No. of data/ restraints/<br>param                   | 7569 / 0 / 498                                                       | 6637 / 0 / 447                                                    | 22474 / 0 / 813                                    | 22757 / 0 / 783                                                                 |
| Largest diff peak, hole/<br>eÅ <sup>-3</sup>        | 0.810, -0.698                                                        | 2.358, -0.847                                                     | 1.144, -0.398                                      | 1.880, -1.638                                                                   |

## 2. NMR Spectra

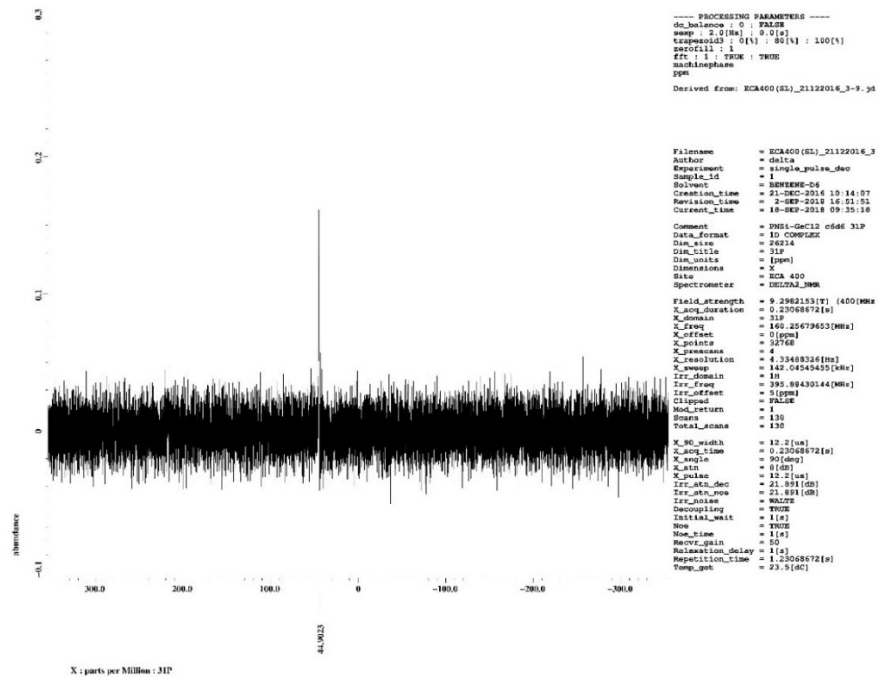

(a)  $^{31}\text{P}$  NMR spectrum of compound **2**

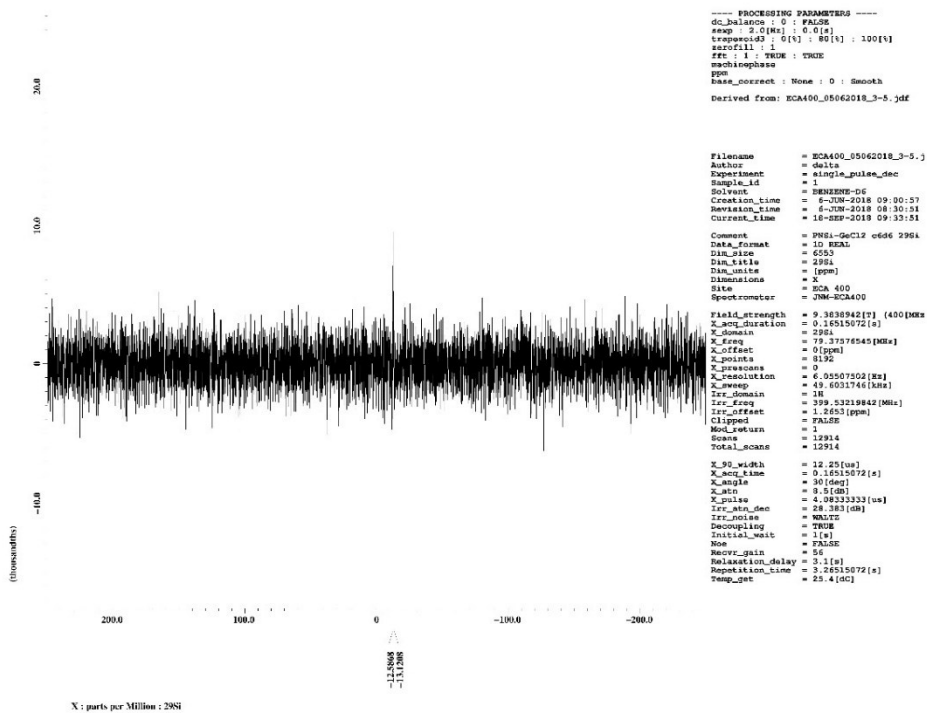

(b)  $^{29}\text{Si}$  NMR spectrum of compound **2**.

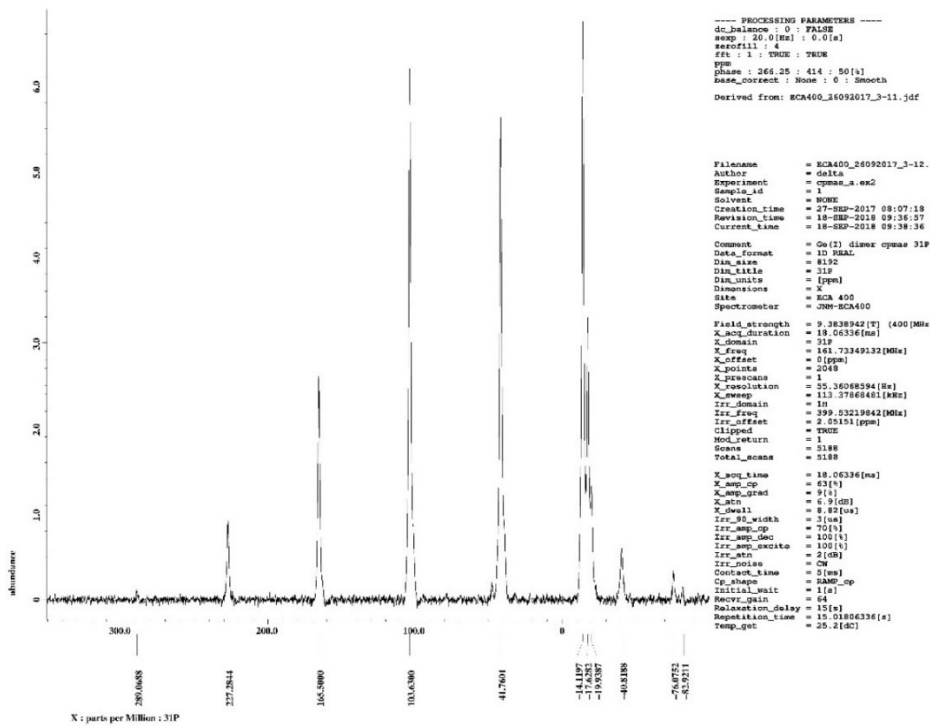

(c)  $^{31}\text{P}$  CPMAS NMR spectrum of compound **3**

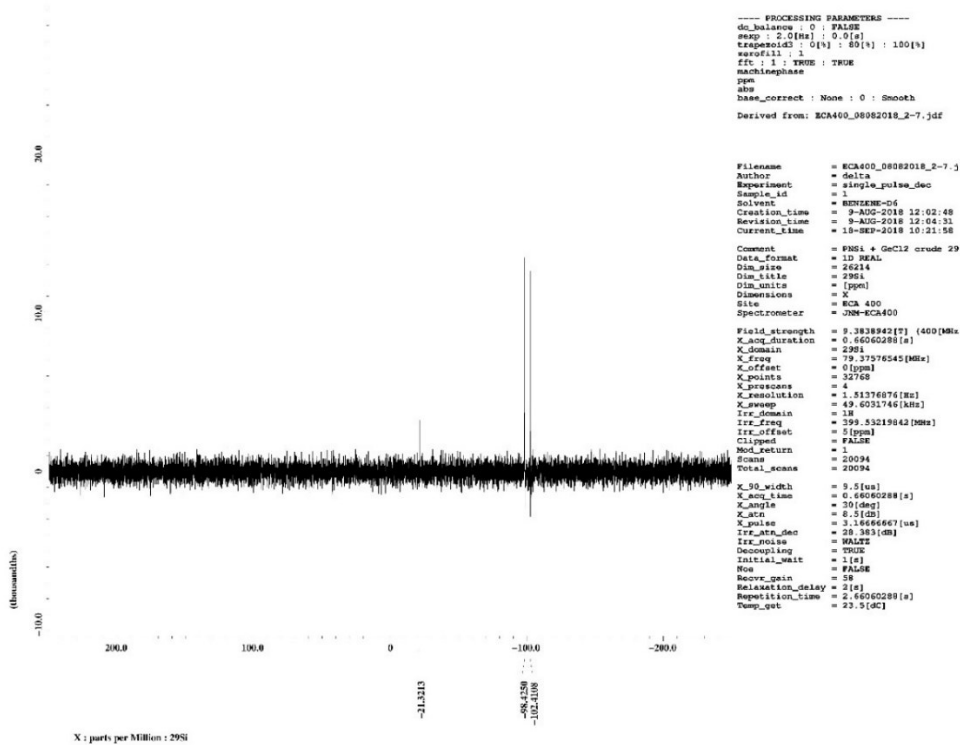

(d)  $^{29}\text{Si}$  NMR spectrum of mother liquor from compound **3** showing presence of compounds **4** and **5**



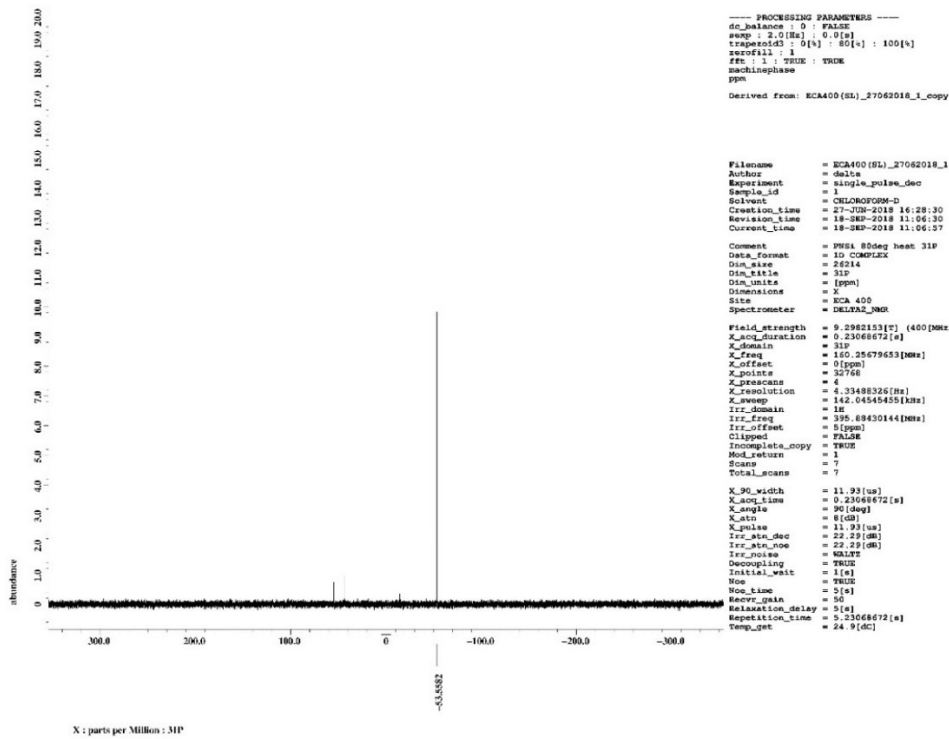

(e)  $^{31}\text{P}$  NMR spectrum of compound 6

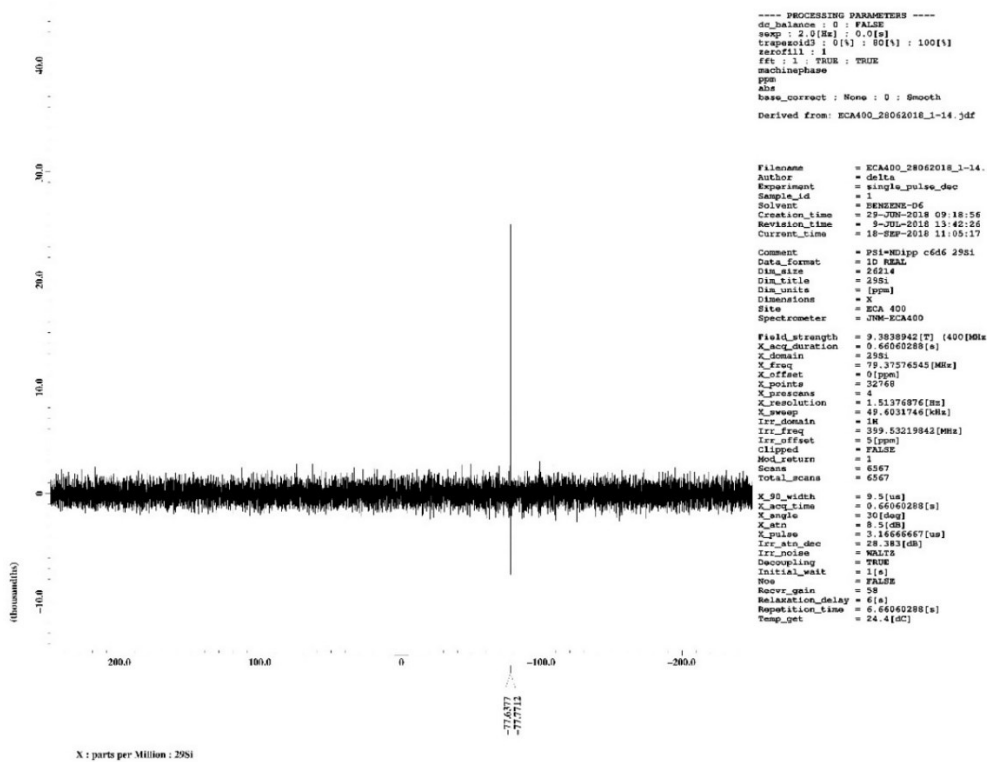

(f)  $^{29}\text{Si}$  NMR spectrum of compound 6

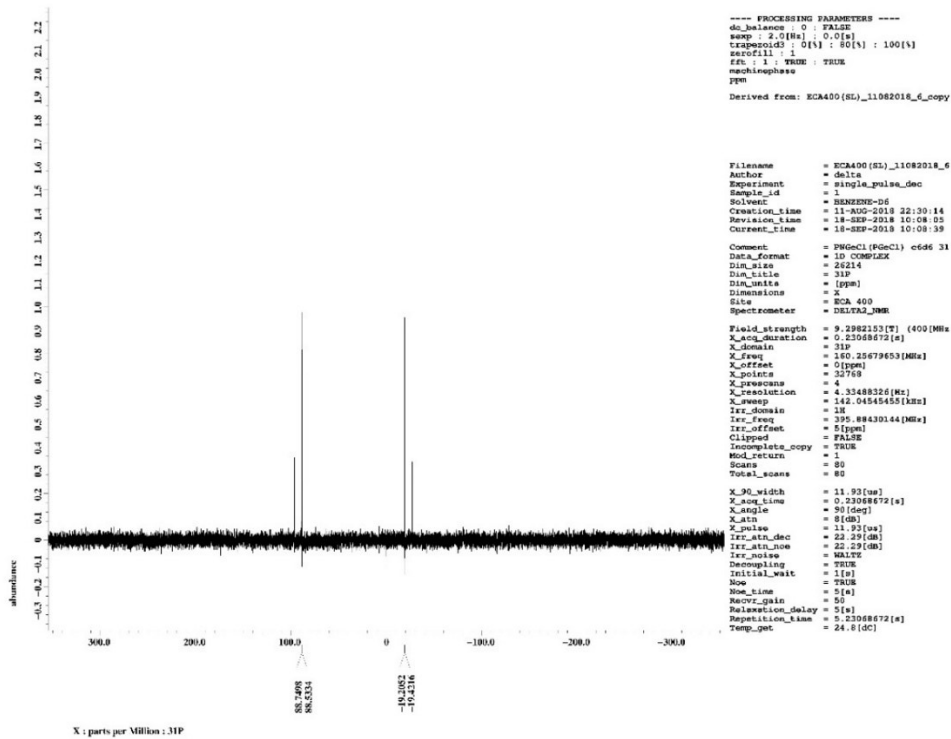

(g)  $^{31}\text{P}$  NMR spectrum of compound 7

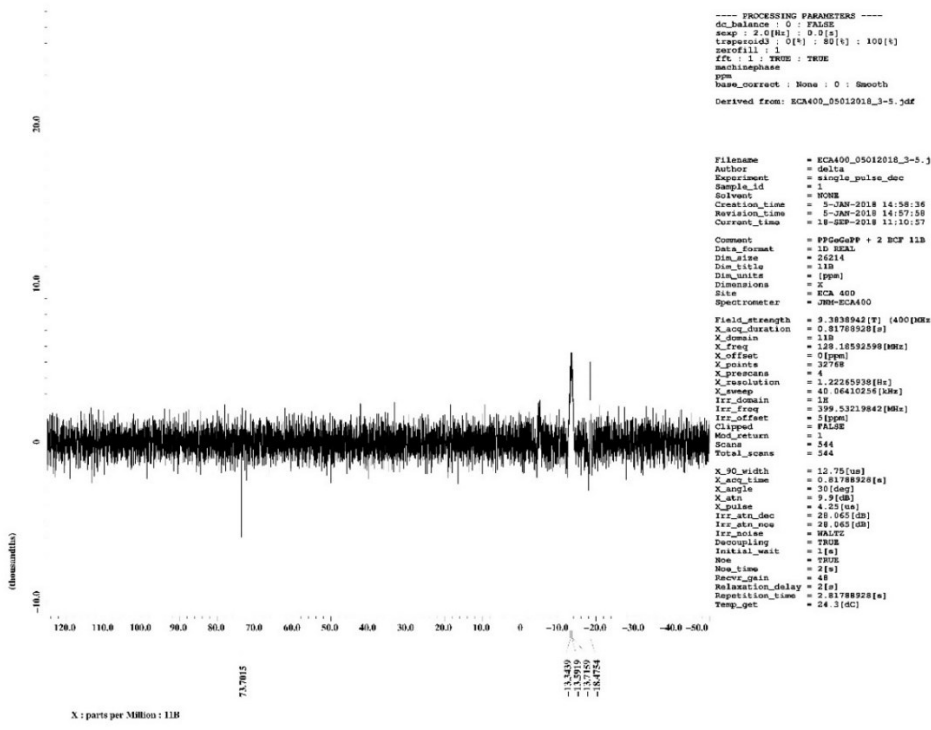

(h)  $^{11}\text{B}$  NMR spectrum of crude reaction mixtures from the reaction of **3** and  $\text{B}(\text{C}_6\text{F}_5)_3$  showing unknown 4-coordinate boron compounds

### 3. References

1. Khan, S.; Pal, S.; Kathewad, N.; Purushothaman, I.; De, S.; Parameswaran, P. *Chem. Commun.* **2016**, 52, 3880 – 3882.
2. Sheldrick, G. M. SHELXL-97; Universität Göttingen: Göttingen, Germany, **1997**.
